# Supplementary material for: Long-Term Benefits of Smoking Cessation on Gastroesophageal Reflux Disease and Health-Related Quality of Life
Source: PLoS One. 2016 Feb 4;11(2):e0147860. doi: 10.1371/journal.pone.0147860 (PMC4742243; doi:10.1371/journal.pone.0147860)
Supplement: S1 Dataset — (XLSX) [file pone.0147860.s001.xlsx]

## Sheet: Sheet1
結果	年齢	性別	喫煙(本/日)	年数	ブリンクマン指数	飲酒	前GERD	後GERD	前―酸	後ー酸	前―もたれ	後ーもたれ	前―Fスケール	後ーFスケール	前―PF	後ーPF	前―RP	後ーRP	前―BP	後ーBP	前―GH	後ーGH	前―VT	後ーVT	前―SF	後ーSF	前―RE	後ーRE	前―MH	後ーMH	前―PCS	後ーPCS	前―MCS	後ーMCS	身長	体重	1年後	BW変化	BMI	post-BMI	BMI変化
失敗	54	1	40	35	1400	1	0	0	0	4	0	2	0	6	53.64	48.52	53.9	48.47	60.22	51.75	50.71	50.71	59.64	54.48	54.74	54.74	54.3	54.3	57.45	44.99	53.1234	49.5478	55.3407	50.5796	163.9	55.9	55	-0.9	20.8091	20.4741	-0.335031
失敗	38	1	20	22	440	1	0	0	3	2	1	0	4	2	53.64	53.64	53.9	53.9	60.22	60.22	50.71	58.7	54.48	54.48	54.74	45.23	49.07	44.48	44.99	44.99	57.3051	59.9455	45.0572	40.3326	173.6	67.6	67	-0.6	22.4309	22.2318	-0.199091
失敗	44	2	30	24	720	0	1	1	2	6	6	11	8	17	36.68	36.68	32.76	32.76	37.91	37.91	50.71	33.37	45.27	28.26	29.86	29.86	32.2	32.2	38.46	28.83	38.9888	36.6486	36.1903	28.1484	162.5	57.3	57	-0.3	21.6994	21.5858	-0.113609
失敗	39	1	60	1	60	1	1	0	6	4	6	3	12	7	53.64	48.52	53.9	48.47	60.22	51.75	50.71	50.71	54.48	45.27	45.23	38.44	54.3	32.2	38.46	38.46	58.6418	54.3226	40.9493	31.347	172.9	60.8	65	4.2	20.3383	21.7432	1.40494
失敗	54	2	20	23	460	1	0	0	5	3	0	0	5	3	36.68	41.93	42.58	42.58	60.22	60.22	50.71	50.71	45.27	54.48	54.74	54.74	32.2	49.07	57.45	50.28	44.0764	46.5932	48.7127	52.3188	153.6	52.7	53.5	0.8	22.3372	22.6763	0.339084
失敗	53	1	30	33	990	1	1	0	5	5	5	2	10	7	36.68	48.52	32.76	48.47	30.7	46.19	50.71	41.11	45.27	45.27	54.74	45.23	54.3	49.07	50.28	44.99	29.3981	45.6876	60.4198	45.2833	178.6	84.4	84	-0.4	26.4594	26.334	-0.1254
失敗	62	1	10	40	400	1	0	0	3	1	4	0	7	1	48.52	53.64	53.9	53.9	51.75	51.75	50.71	50.71	54.48	54.48	54.74	54.74	49.07	54.3	50.28	44.99	50.7908	53.7109	50.4804	48.6568	172.1	77.7	78	0.3	26.2337	26.335	0.101288
失敗	55	1	3	35	105	0	1	1	5	6	12	5	17	11	48.52	13.5	48.47	15.7	30.7	30.7	50.71	41.11	54.48	45.27	45.23	29.86	44.48	44.48	44.99	44.99	44.1141	14.6058	47.1376	54.0267	170.4	71.8	66	-5.8	24.7278	22.7303	-1.99751
失敗	58	2	20	40	800	0	1	0	6	2	3	1	9	3	53.64	53.64	48.47	53.9	46.19	60.22	50.71	58.7	45.27	54.48	54.74	54.74	44.48	54.3	38.46	57.45	52.5282	54.5741	40.9291	54.3157	149.8	53.1	53.7	0.6	23.6631	23.9304	0.267379
失敗	31	2	10	12	120	1	1	1	2	0	9	9	11	9	41.93	53.64	48.47	53.9	37.91	60.22	50.71	50.71	54.48	54.48	54.74	54.74	44.48	54.3	44.99	57.45	43.7132	52.7345	49.8936	54.4771	168.9	63	62	-1	22.0842	21.7336	-0.350543
失敗	41	2	20	23	460	0	0	1	0	0	0	8	0	8	53.64	53.64	53.9	53.9	60.22	60.22	50.71	58.7	54.48	59.64	54.74	54.74	54.3	54.3	57.45	57.45	52.7345	54.963	54.4771	55.1793	162.1	66.9	62	-4.9	25.4601	23.5953	-1.86479
失敗	30	1	25	13	325	1	0	0	2	4	2	2	4	6	53.64	53.64	48.47	53.9	51.75	51.75	41.11	50.71	45.27	54.48	45.23	54.74	49.07	49.07	44.99	50.28	49.6212	52.8732	43.3716	49.4578	170	59.1	61	1.9	20.4498	21.1073	0.657439
失敗	55	1	40	40	1600	1	0	0	2	1	2	1	4	2	53.64	53.64	53.9	53.9	46.19	51.75	50.71	50.71	45.27	45.27	45.23	45.23	49.07	32.2	50.28	38.46	50.4491	58.399	46.2127	31.2754	170.4	74.1	75	0.9	25.5199	25.8299	0.309958
失敗	47	2	20	30	600	1	0	0	0	2	0	5	0	7	53.64	36.68	53.9	32.76	60.22	51.75	50.71	41.11	45.27	45.27	38.44	45.23	49.07	49.07	44.99	50.28	56.8188	35.0918	39.0716	52.4095	168.3	54.7	55	0.3	19.3116	19.4176	0.105914
失敗	40	2	35	25	875	0	0	0	0	1	5	4	5	5	48.52	53.64	48.47	53.9	51.75	46.19	50.71	41.11	39.78	45.27	54.74	54.74	44.48	49.07	28.83	50.28	54.8173	48.1176	34.5984	48.9994	159.1	53	54	1	20.938	21.3331	0.395057
失敗	23	1	20	7	140	0	1	1	6	10	3	5	9	15	41.93	53.64	48.47	53.9	60.22	60.22	41.11	58.7	45.27	59.64	38.44	54.74	44.48	54.3	38.46	57.45	50.4343	54.963	36.774	55.1793	177.3	54.1	60	5.9	17.21	19.0868	1.87687
失敗	34	2	25	13	325	1	1	0	2	1	7	4	9	5	53.64	53.64	48.47	53.9	46.19	51.75	50.71	50.71	54.48	54.48	54.74	29.86	49.07	32.2	50.28	38.46	48.9414	59.2892	51.2472	28.6264	157.4	51.9	51	-0.9	20.9487	20.5855	-0.363273
失敗	24	1	100	2	200	0	0	0	2	0	2	2	4	2	53.64	48.52	48.47	42.58	51.75	60.22	50.71	50.71	45.27	54.48	45.23	54.74	49.07	44.48	44.99	44.99	51.8315	51.5647	43.1776	45.9861	172	62.8	63.5	0.7	21.2277	21.4643	0.236614
失敗	47	1	20	27	540	1	1	0	10	1	4	1	14	2	41.93	41.93	42.58	42.58	37.91	46.19	41.11	50.71	39.78	39.78	38.44	54.74	44.48	44.48	38.46	50.28	40.3355	41.4934	40.3995	50.1317	172.9	69.8	60	-9.8	23.3488	20.0706	-3.2782
失敗	31	1	11	10	110	0	0	0	2	2	3	0	5	2	41.93	53.64	42.58	53.9	60.22	60.22	33.37	50.71	39.78	45.27	45.23	54.74	44.48	54.3	44.99	50.28	43.9054	54.225	42.5994	48.8069	165.6	49.5	51	1.5	18.0503	18.5973	0.546979
失敗	43	1	20	1	20	0	0	0	2	2	1	1	3	3	53.64	53.64	53.9	53.9	51.75	51.75	50.71	50.71	54.48	54.48	54.74	54.74	54.3	54.3	57.45	57.45	49.9144	49.9144	55.8316	55.8316	178.9	71.2	71	-0.2	22.2464	22.1839	-0.0624898
失敗	48	1	20	30	600	0	0	0	4	0	1	0	5	0	41.93	48.52	42.58	48.47	51.75	51.75	50.71	50.71	45.27	45.27	38.44	38.44	44.48	44.48	44.99	44.99	45.578	50.5152	42.6713	40.3786	170.6	85.9	88	2.1	29.5145	30.236	0.721541
失敗	34	2	15	14	210	1	1	0	3	4	9	1	12	5	53.64	41.93	53.9	42.58	60.22	51.75	50.71	50.71	45.27	45.27	54.74	38.44	54.3	44.48	44.99	44.99	55.8368	45.578	45.7608	42.6713	162.8	50.1	52	1.9	18.9029	19.6198	0.716877
失敗	47	1	20	29	580	0	0	0	0	0	1	1	1	1	53.64	53.64	53.9	53.9	60.22	60.22	58.7	50.71	54.48	45.27	54.74	54.74	54.3	54.3	57.45	57.45	54.5741	52.0403	54.3157	52.9356	176.2	64.2	65	0.8	20.6787	20.9364	0.257678
失敗	71	1	20	1	20	1	1	1	9	13	7	8	16	21	36.68	41.93	48.47	42.58	51.75	37.91	41.11	41.11	39.78	45.27	38.44	45.23	44.48	44.48	44.99	44.99	43.0755	38.6731	42.0184	46.9297	164.5	75.8	74.5	-1.3	28.0116	27.5312	-0.480409
失敗	71	1	10	50	500	0	0	0	0	0	0	0	0	0	53.64	53.64	53.9	53.9	60.22	60.22	58.7	58.7	54.48	54.48	54.74	54.74	54.3	54.3	57.45	57.45	54.5741	54.5741	54.3157	54.3157	151.9	46.3	46	-0.3	20.0662	19.9362	-0.130019
失敗	27	1	10	10	100	1	0	0	2	2	1	1	3	3	53.64	53.64	53.9	53.9	60.22	60.22	58.7	58.7	54.48	54.48	54.74	54.74	44.48	49.07	44.99	44.99	59.8242	59.1448	42.9254	44.8958	165.1	55	55	0	20.1776	20.1776	0
失敗	44	1	20	1	20	1	0	0	0	0	0	0	0	0	53.64	48.52	53.9	48.47	60.22	46.19	41.11	50.71	45.27	45.27	54.74	38.44	49.07	44.48	50.28	44.99	52.7889	48.664	46.7557	41.2678	183.3	74.8	70	-4.8	22.2626	20.834	-1.42862
失敗	57	1	20	37	740	0	0	0	4	4	3	3	7	7	36.68	36.68	32.76	32.76	30.7	30.7	41.11	41.11	45.27	54.48	38.44	38.44	49.07	49.07	50.28	50.28	28.1698	28.864	53.9246	55.4661	170.7	66.7	67.5	0.8	22.8907	23.1652	0.274551
失敗	47	2	20	30	600	0	0	0	0	0	2	2	2	2	48.52	48.52	53.9	48.47	51.75	51.75	50.71	50.71	39.78	39.78	45.23	38.44	49.07	44.48	50.28	44.99	49.8042	50.1014	45.4272	39.4598	156.2	66.1	66	-0.1	27.0919	27.0509	-0.0409862
失敗	52	1	15	25	375	1	0	0	0	0	0	0	0	0	53.64	53.64	53.9	53.9	60.22	60.22	50.71	50.71	45.27	45.27	38.44	38.44	44.48	44.48	38.46	38.46	59.4879	59.4879	33.3411	33.3411	171.4	65	67	2	22.1254	22.8062	0.680782
失敗	43	1	5	20	100	1	1	1	5	6	5	4	10	10	53.64	36.68	53.9	53.9	60.22	60.22	61.52	61.52	59.64	59.64	54.74	54.74	54.3	54.3	57.45	57.45	55.6123	48.7143	55.1223	58.5096	163.6	75.6	77	1.4	28.2459	28.769	0.523072
失敗	41	2	10	20	200	1	0	0	1	1	3	3	4	4	41.93	41.93	42.58	42.58	46.19	46.19	58.7	58.7	54.48	54.48	54.74	54.74	54.3	54.3	50.28	50.28	42.9873	42.9873	56.6461	56.6461	159.8	72.1	73	0.9	28.2346	28.587	0.352443
失敗	31	2	20	10	200	0	1	0	6	1	6	3	12	4	41.93	41.93	42.58	32.76	60.22	51.75	50.71	50.71	54.48	54.48	38.44	29.86	44.48	44.48	50.28	50.28	47.4804	41.007	45.9044	46.5477	166.4	83.1	80	-3.1	30.012	28.8924	-1.11958
失敗	35	1	10	15	150	0	0	0	0	0	2	2	2	2	53.64	53.64	53.9	53.9	60.22	60.22	61.52	61.52	59.64	59.64	54.74	54.74	54.3	54.3	57.45	57.45	55.6123	55.6123	55.1223	55.1223	169.6	69.8	70	0.2	24.2663	24.3358	0.069531
失敗	49	1	40	32	1280	0	1	1	10	10	1	1	11	11	48.52	48.52	48.47	48.47	51.75	51.75	41.11	41.11	39.78	39.78	45.23	45.23	49.07	49.07	44.99	44.99	47.125	47.125	43.4753	43.4753	170.1	72.8	72	-0.8	25.1607	24.8842	-0.276491
失敗	30	1	40	15	600	1	1	1	6	6	5	5	11	11	53.64	53.64	53.9	53.9	60.22	60.22	58.7	50.71	54.48	54.48	54.74	54.74	54.3	54.3	57.45	57.45	54.5741	52.7345	54.3157	54.4771	171.5	50.56	50	-0.56	17.1901	16.9997	-0.190397
失敗	49	2	15	29	435	1	0	0	1	1	2	2	3	3	53.64	53.64	53.9	53.9	51.75	51.75	50.71	50.71	45.27	45.27	54.74	54.74	49.07	49.07	50.28	50.28	52.1791	52.1791	47.9163	47.9163	167.8	60.5	60	-0.5	21.4868	21.3092	-0.177577
失敗	57	2	20	37	740	0	0	0	1	1	1	1	2	2	48.52	48.52	48.47	48.47	46.19	46.19	50.71	50.71	54.48	54.48	45.23	54.74	49.07	44.48	44.99	44.99	48.5921	49.1503	46.6308	47.2533	163.4	54.1	53	-1.1	20.2625	19.8505	-0.411992
失敗	62	2	30	42	1260	1	1	1	7	7	5	1	12	8	53.64	48.52	48.47	48.47	51.75	51.75	41.11	41.11	45.27	45.27	45.23	38.44	49.07	44.48	38.46	44.99	51.6109	48.3049	39.6114	40.5725	156.1	58.1	63.2	5.1	23.8435	25.9365	2.09298
失敗	42	1	40	22	880	1	1	1	5	11	8	8	13	19	41.93	41.93	42.58	42.58	51.75	60.22	41.11	41.11	39.78	39.78	38.44	29.86	32.2	32.2	44.99	38.46	44.7717	49.6908	36.6749	29.221	179	98.7	100.5	1.8	30.8043	31.3661	0.56178
失敗	37	1	20	15	300	1	1	1	23	19	8	6	31	25	36.68	41.93	42.58	32.76	30.7	37.91	50.71	50.71	45.27	45.27	38.44	38.44	44.48	44.48	50.28	44.99	34.8223	37.2072	50.1323	46.5126	165	71.6	69	-2.6	26.2994	25.3444	-0.955005
失敗	57	1	10	1	10	0	0	1	0	11	0	10	0	21	41.93	53.64	42.58	53.9	30.7	51.75	33.37	61.52	45.27	59.64	29.86	54.74	32.2	49.07	38.46	44.99	38.4939	57.3629	35.017	47.0569	152.4	52.5	54	1.5	22.6042	23.25	0.645835
失敗	56	2	6	30	180	0	1	0	8	3	6	0	14	3	53.64	53.64	53.9	53.9	46.19	46.19	41.11	50.71	45.27	54.48	45.23	54.74	44.48	54.3	44.99	50.28	50.5301	50.2478	41.3901	52.5921	157	52.9	53.8	0.9	21.4613	21.8264	0.365126
失敗	52	2	5	30	150	0	0	0	4	4	2	1	6	5	48.52	53.64	48.47	53.9	51.75	51.75	50.71	50.71	54.48	54.48	54.74	54.74	54.3	44.48	44.99	38.46	49.5478	57.1541	50.5796	40.6812	172	69	63	-6	23.3234	21.2953	-2.02812
失敗	60	1	20	30	600	1	0	0	2	2	2	2	4	4	53.64	53.64	53.9	53.9	60.22	60.22	50.71	50.71	45.27	45.27	54.74	54.74	49.07	49.07	50.28	50.28	54.9992	54.9992	46.5618	46.5618	157.4	48.8	50	1.2	19.6975	20.1818	0.484364
失敗	67	2	30	40	1200	0	1	1	4	5	10	12	14	17	48.52	48.52	42.58	42.58	46.19	46.19	41.11	41.11	45.27	45.27	54.74	45.23	32.2	32.2	28.83	28.83	50.7306	50.8518	32.3054	29.7126	149	37.5	38	0.5	16.8911	17.1163	0.225215
失敗	59	1	60	40	2400	0	1	1	5	10	3	5	8	15	53.64	48.52	53.9	53.9	60.22	46.19	50.71	50.71	45.27	45.27	54.74	54.74	54.3	54.3	57.45	50.28	52.0403	47.4713	52.9356	52.0731	164.3	71.7	60	-11.7	26.561	22.2268	-4.33422
失敗	63	1	30	40	1200	0	0	0	0	1	4	0	4	1	53.64	53.64	53.9	53.9	60.22	60.22	61.52	61.52	59.64	59.64	54.74	54.74	54.3	54.3	57.45	57.45	55.6123	55.6123	55.1223	55.1223	168	51.7	52	0.3	18.3177	18.424	0.106293
失敗	28	1	10	8	80	1	1	1	10	13	9	12	19	25	48.52	41.93	53.9	42.58	60.22	51.75	41.11	41.11	45.27	39.78	54.74	45.23	54.3	32.2	50.28	44.99	49.9323	44.6852	50.0234	38.5261	169	69.5	75	5.5	24.3339	26.2596	1.9257
成功	36	1	15	12	180	0	1	0	8	0	9	0	17	0	48.52	53.64	48.47	53.9	46.19	37.91	41.11	50.71	45.27	54.48	54.74	54.74	49.07	54.3	50.28	57.45	43.9546	45.3064	50.9222	58.0449	166.6	62.6	58	-4.6	22.554	20.8967	-1.65733
成功	46	1	13	20	260	0	0	0	2	0	3	1	5	1	13.5	53.64	53.9	53.9	60.22	60.22	50.71	50.71	54.48	54.48	54.74	54.74	49.07	54.3	44.99	50.28	40.9794	54.9191	53.0739	50.3484	167.1	73.9	77	3.1	26.4662	27.5764	1.11022
成功	45	1	20	25	500	0	0	0	1	0	2	0	3	0	53.64	53.64	53.9	53.9	46.19	60.22	50.71	50.71	54.48	54.48	54.74	54.74	54.3	54.3	57.45	57.45	48.0632	52.7345	56.7208	54.4771	169.8	70.9	75	4.1	24.5907	26.0127	1.42203
成功	35	1	20	18	360	1	0	0	1	1	3	1	4	2	53.64	53.64	53.9	53.9	51.75	60.22	50.71	50.71	45.27	54.48	54.74	54.74	44.48	54.3	44.99	57.45	54.4704	52.7345	42.8999	54.4771	164.6	58.6	59	0.4	21.6291	21.7767	0.147639
成功	26	1	25	8	200	1	0	0	3	3	3	4	6	7	53.64	53.64	53.9	53.9	60.22	60.22	50.71	50.71	45.27	59.64	54.74	54.74	54.3	54.3	57.45	57.45	52.0403	53.1234	52.9356	55.3407	165	70	80	10	25.7117	29.3848	3.67309
成功	56	1	20	30	600	1	1	1	12	10	11	11	23	21	41.93	41.93	42.58	42.58	37.91	37.91	41.11	41.11	39.78	39.78	29.86	38.44	32.2	44.48	28.83	44.99	45.1969	38.3459	27.2435	44.1596	171.1	85	88	3	29.0348	30.0596	1.02476
成功	41	2	50	10	500	1	0	0	1	1	5	4	6	5	41.93	53.64	48.47	48.47	37.91	60.22	50.71	58.7	45.27	59.64	54.74	54.74	49.07	54.3	57.45	57.45	38.5431	52.8824	57.4973	56.0796	165	59.2	61	1.8	21.7447	22.4059	0.661157
成功	58	1	15	30	450	0	0	0	0	0	0	0	0	0	53.64	53.64	53.9	53.9	60.22	60.22	50.71	58.7	45.27	59.64	54.74	54.74	49.07	54.3	50.28	57.45	54.9992	54.963	46.5618	55.1793	168.2	63.7	67	3.3	22.5158	23.6822	1.16644
成功	24	1	30	7	210	0	0	0	1	0	0	0	1	0	48.52	53.64	53.9	53.9	60.22	60.22	41.11	50.71	45.27	54.48	45.23	54.74	44.48	49.07	44.99	50.28	53.119	55.6933	40.169	48.1033	160.9	57.5	61	3.5	22.2104	23.5623	1.35194
成功	62	2	15	42	630	1	0	0	0	0	0	0	0	0	41.93	48.52	42.58	48.47	37.91	46.19	50.71	50.71	45.27	54.48	38.44	45.23	44.48	49.07	44.99	38.46	40.97	50.5817	44.8846	42.8707	152.3	45.5	46	0.5	19.6161	19.8316	0.215561
成功	40	1	30	25	750	1	1	1	6	10	3	5	9	15	48.52	48.52	48.47	48.47	60.22	60.22	41.11	58.7	45.27	54.48	54.74	54.74	54.3	49.07	50.28	50.28	47.8517	53.3699	50.9236	49.8647	163.1	71.3	76	4.7	26.8029	28.5697	1.76681
成功	40	1	15	22	330	0	0	0	1	2	3	3	4	5	53.64	53.64	53.9	53.9	60.22	60.22	50.71	50.71	45.27	45.27	54.74	54.74	54.3	54.3	57.45	57.45	52.0403	52.0403	52.9356	52.9356	175.4	61.3	62.5	1.2	19.9251	20.3152	0.390052
成功	40	2	20	23	460	0	0	0	0	0	1	7	1	7	53.64	13.5	53.9	15.7	46.19	60.22	50.71	50.71	45.27	45.27	38.44	29.86	44.48	13.53	44.99	44.99	52.827	31.2264	39.345	45.5803	157.5	43.2	52	8.8	17.415	20.9625	3.54749
成功	44	2	13	30	390	0	1	0	2	0	6	3	8	3	41.93	41.93	42.58	42.58	51.75	51.75	50.71	50.71	45.27	54.48	54.74	54.74	44.48	54.3	44.99	57.45	45.3702	40.8142	47.1153	60.0471	158.5	48.6	56	7.4	19.3454	22.291	2.9456
成功	46	1	20	26	520	1	0	0	0	0	0	0	0	0	53.64	48.52	53.9	53.9	60.22	51.75	58.7	50.71	54.48	54.48	54.74	54.74	54.3	54.3	57.45	57.45	54.5741	47.832	54.3157	56.8542	172.1	82.1	81	-1.1	27.7192	27.3479	-0.371391
成功	28	1	20	10	200	0	1	1	3	3	7	6	10	9	53.64	53.64	53.9	53.9	60.22	60.22	58.7	61.52	59.64	59.64	54.74	54.74	54.3	54.3	57.45	57.45	54.963	55.6123	55.1793	55.1223	179.1	74.4	80	5.6	23.1943	24.9401	1.74581
成功	59	1	30	39	1170	1	0	0	1	0	4	1	5	1	53.64	41.93	53.9	53.9	46.19	51.75	50.71	58.7	45.27	54.48	54.74	54.74	49.07	49.07	50.28	50.28	50.3279	49.9502	48.8055	51.6351	170.4	51.5	53	1.5	17.7365	18.2531	0.516597
成功	27	1	40	7	280	1	0	1	0	5	0	3	0	8	53.64	53.64	53.9	53.9	60.22	60.22	50.71	50.71	59.64	54.48	54.74	54.74	54.3	49.07	38.46	50.28	58.9095	55.6933	44.4057	48.1033	175	67	68.4	1.4	21.8776	22.3347	0.457143
成功	40	1	30	20	600	0	0	0	5	1	2	0	7	1	53.64	53.64	53.9	53.9	60.22	60.22	50.71	58.7	54.48	54.48	45.23	54.74	54.3	54.3	50.28	57.45	55.0404	54.5741	47.7556	54.3157	171.1	65.4	69.5	4.1	22.3397	23.7402	1.4005
成功	37	2	20	17	340	1	1	1	6	2	4	8	10	10	53.64	53.64	53.9	53.9	37.91	46.19	41.11	41.11	45.27	39.78	38.44	54.74	32.2	54.3	50.28	57.45	48.0658	44.745	38.6377	54.4543	158.8	58.4	63	4.6	23.1586	24.9827	1.82413
成功	63	2	10	30	300	0	0	0	0	0	2	4	2	4	53.64	53.64	53.9	53.9	60.22	60.22	50.71	50.71	54.48	54.48	54.74	54.74	49.07	54.3	50.28	57.45	55.6933	52.7345	48.1033	54.4771	154.8	37.2	43.5	6.3	15.5239	18.153	2.62905
成功	36	1	15	20	300	0	0	0	4	2	3	2	7	4	53.64	53.64	53.9	53.9	60.22	60.22	50.71	50.71	45.27	45.27	38.44	54.74	54.3	49.07	57.45	50.28	52.2482	54.9992	48.4916	46.5618	172.6	73.7	74	0.3	24.7392	24.8399	0.100702
成功	38	1	18	18	324	1	0	0	0	0	0	0	0	0	53.64	53.64	53.9	53.9	60.22	60.22	50.71	58.7	59.64	59.64	54.74	54.74	54.3	54.3	57.45	57.45	53.1234	54.963	55.3407	55.1793	178.2	79.8	84	4.2	25.1297	26.4523	1.32262
成功	58	1	20	40	800	1	0	0	0	1	0	0	0	1	53.64	53.64	53.9	53.9	60.22	60.22	50.71	50.71	54.48	54.48	45.23	54.74	49.07	49.07	50.28	50.28	55.8146	55.6933	45.5105	48.1033	175	57.8	62	4.2	18.8735	20.2449	1.37143
成功	63	2	20	27	540	0	0	0	0	0	3	2	3	2	48.52	48.52	48.47	53.9	51.75	51.75	50.71	50.71	54.48	54.48	54.74	54.74	54.3	54.3	57.45	57.45	45.7514	47.832	57.7544	56.8542	150.6	47	50.5	3.5	20.7228	22.266	1.54319
成功	38	2	15	20	300	0	0	0	0	1	0	2	0	3	53.64	48.52	53.9	48.47	60.22	60.22	58.7	50.71	59.64	59.64	54.74	54.74	54.3	49.07	57.45	50.28	54.963	51.9192	55.1793	50.8897	161.1	51.9	53	1.1	19.9975	20.4214	0.42384
成功	54	1	35	37	1295	0	0	0	0	0	0	1	0	1	53.64	48.52	53.9	48.47	60.22	51.75	61.52	58.7	59.64	54.48	54.74	45.23	54.3	49.07	57.45	44.99	55.6123	52.2829	55.1223	45.5803	170.3	78.5	82	3.5	27.067	28.2738	1.20681
成功	41	1	20	24	480	1	1	1	10	14	8	14	18	28	41.93	36.68	42.58	32.76	60.22	37.91	33.37	33.37	45.27	39.78	45.23	54.74	49.07	44.48	50.28	44.99	42.0279	30.458	48.5347	51.4366	179.3	67.3	79	11.7	20.9341	24.5735	3.63936
成功	63	2	30	35	1050	0	0	1	0	12	0	5	0	17	53.64	53.64	53.9	53.9	60.22	60.22	58.7	58.7	54.48	54.48	54.74	54.74	54.3	54.3	57.45	57.45	54.5741	54.5741	54.3157	54.3157	146.4	55.5	61	5.5	25.8947	28.4608	2.56614
成功	41	1	25	20	500	0	0	0	3	1	2	1	5	2	48.52	36.68	32.76	32.76	46.19	37.91	33.37	41.11	39.78	39.78	29.86	29.86	32.2	32.2	38.46	38.46	42.155	36.3647	31.9329	35.4654	162.2	45.2	50	4.8	17.1805	19.005	1.82448
成功	62	1	20	40	800	1	0	0	1	0	0	0	1	0	53.64	53.64	53.9	53.9	60.22	60.22	50.71	58.7	45.27	59.64	54.74	54.74	54.3	54.3	57.45	57.45	52.0403	54.963	52.9356	55.1793	166	60.5	56	-4.5	21.9553	20.3223	-1.63304
成功	37	1	20	20	400	1	0	0	2	0	1	0	3	0	53.64	53.64	53.9	53.9	51.75	60.22	50.71	58.7	54.48	54.48	54.74	54.74	54.3	54.3	50.28	57.45	52.099	54.5741	51.7029	54.3157	173.7	76.9	79.7	2.8	25.4875	26.4155	0.928022
成功	45	1	20	25	500	1	1	0	5	1	4	2	9	3	53.64	53.64	53.9	53.9	60.22	60.22	50.71	50.71	54.48	54.48	54.74	54.74	54.3	54.3	50.28	50.28	54.9191	54.9191	50.3484	50.3484	173.9	74.5	73.4	-1.1	24.6353	24.2715	-0.363742
成功	41	1	40	25	1000	1	1	1	6	7	4	1	10	8	53.64	48.52	53.9	48.47	37.91	60.22	50.71	58.7	45.27	54.48	54.74	54.74	44.48	54.3	44.99	57.45	49.8623	50.4111	45.1131	56.2385	171.3	86.2	78	-8.2	29.376	26.5815	-2.79447
成功	48	1	30	28	840	0	0	0	1	0	1	1	2	1	53.64	48.52	53.9	48.47	37.91	46.19	50.71	41.11	45.27	45.27	54.74	54.74	44.48	49.07	44.99	57.45	49.8623	41.7699	45.1131	55.0509	173.6	73.7	80	6.3	24.455	26.5455	2.09046
成功	52	2	15	34	510	0	1	0	9	2	11	0	20	2	48.52	41.93	42.58	42.58	46.19	37.91	41.11	50.71	54.48	54.48	45.23	54.74	44.48	54.3	38.46	57.45	46.794	36.2062	42.0707	62.2604	164.4	53.8	56.3	2.5	19.9058	20.8307	0.924989
成功	32	2	15	13	195	1	1	0	4	0	6	0	10	0	48.52	53.64	48.47	53.9	60.22	60.22	41.11	50.71	39.78	54.48	45.23	54.74	49.07	49.07	44.99	44.99	49.9451	57.3051	42.1207	45.0572	154.1	45.1	48	2.9	18.992	20.2132	1.22122
成功	28	2	10	10	100	0	1	0	17	1	11	6	28	7	53.64	53.64	48.47	53.9	60.22	60.22	41.11	50.71	45.27	45.27	54.74	45.23	54.3	49.07	50.28	44.99	49.9341	56.7322	49.9011	40.9229	164.9	46.9	52	5.1	17.2477	19.1233	1.87555
成功	41	2	20	21	420	0	0	1	1	2	0	6	1	8	53.64	53.64	53.9	48.47	51.75	51.75	50.71	50.71	54.48	54.48	54.74	54.74	54.3	54.3	50.28	50.28	52.099	50.0184	51.7029	52.6031	157.6	49.9	48.7	-1.2	20.0904	19.6072	-0.483135
成功	32	1	10	16	160	1	1	1	4	5	8	4	12	9	53.64	53.64	53.9	53.9	60.22	37.91	50.71	50.71	59.64	54.48	54.74	54.74	49.07	49.07	44.99	50.28	57.694	48.2652	45.9208	51.6711	167	65.9	63	-2.9	23.6294	22.5896	-1.03984
成功	41	1	10	1	10	1	0	0	0	0	0	0	0	0	53.64	53.64	53.9	53.9	51.75	46.19	50.71	50.71	54.48	45.27	54.74	54.74	49.07	44.48	50.28	44.99	52.8732	52.6192	49.4578	43.789	171.8	58.4	56	-2.4	19.7864	18.9732	-0.813139
成功	27	2	10	7	70	1	1	0	2	4	6	3	8	7	53.64	41.93	53.9	42.58	60.22	37.91	58.7	41.11	59.64	45.27	54.74	38.44	49.07	54.3	50.28	57.45	57.9219	33.5096	48.8055	56.4688	155.7	49.4	53.5	4.1	20.3774	22.0687	1.69125
成功	23	2	40	7	280	0	1	1	5	8	7	10	12	18	41.93	41.93	42.58	53.9	51.75	46.19	41.11	50.71	45.27	45.27	38.44	54.74	49.07	44.48	44.99	38.46	42.6882	49.8461	44.8356	42.3676	159.9	52.4	56	3.6	20.4944	21.9024	1.40801
成功	51	2	20	30	600	1	1	1	12	7	12	11	24	18	13.5	13.5	15.7	42.58	60.22	30.7	41.11	41.11	39.78	39.78	29.86	29.86	32.2	13.53	28.83	28.83	30.7623	33.997	33.8102	26.0601	169.7	59.8	57	-2.8	20.7653	19.793	-0.972287
成功	45	2	10	25	250	0	1	1	4	5	9	8	13	13	41.93	41.93	42.58	42.58	51.75	37.91	41.11	50.71	39.78	45.27	38.44	38.44	44.48	44.48	44.99	38.46	42.9539	42.9596	41.9463	41.1244	151.8	42	44	2	18.2266	19.0945	0.867934
成功	27	2	20	8	160	0	1	0	4	3	5	4	9	7	36.68	48.52	32.76	48.47	51.75	51.75	41.11	50.71	45.27	54.48	29.86	45.23	32.2	49.07	28.83	50.28	44.3207	48.8315	28.6257	48.7878	152	41.5	48	6.5	17.9623	20.7756	2.81337
成功	30	1	15	12	180	0	0	0	0	0	0	0	0	0	53.64	53.64	53.9	53.9	60.22	60.22	58.7	58.7	59.64	54.48	45.23	54.74	49.07	54.3	50.28	57.45	58.0431	54.5741	46.2127	54.3157	177.1	62.6	65	2.4	19.9589	20.7241	0.765199
成功	42	1	40	22	880	1	1	0	0	0	11	5	11	5	53.64	53.64	53.9	53.9	60.22	60.22	58.7	61.52	59.64	59.64	54.74	54.74	54.3	49.07	57.45	50.28	54.963	58.5711	55.1793	48.7486	167.6	52.9	56	3.1	18.8325	19.9361	1.10361
成功	30	2	15	17	255	0	0	1	1	5	5	6	6	11	41.93	41.93	42.58	42.58	60.22	46.19	41.11	33.37	45.27	45.27	29.86	38.44	44.48	49.07	38.46	50.28	48.2868	37.4432	35.4113	48.9272	161	44.6	46	1.4	17.2061	17.7462	0.540103
成功	37	1	3	17	51	1	1	1	4	4	7	4	11	8	53.64	53.64	53.9	53.9	60.22	51.75	50.71	50.71	54.48	54.48	54.74	45.23	54.3	44.48	57.45	44.99	52.7345	55.2858	54.4771	41.8485	169.3	70.6	70	-0.6	24.6315	24.4222	-0.209333
成功	29	1	12	8	96	0	1	0	6	0	11	0	17	0	41.93	53.64	42.58	53.9	46.19	60.22	41.11	50.71	45.27	45.27	54.74	54.74	44.48	54.3	44.99	57.45	41.3087	52.0403	48.1984	52.9356	150	67	68	1	29.7778	30.2222	0.444444
成功	30	1	10	10	100	1	0	0	1	0	3	0	4	0	53.64	53.64	53.9	53.9	60.22	60.22	58.7	58.7	54.48	54.48	54.74	54.74	54.3	54.3	50.28	50.28	56.7588	56.7588	50.187	52.9356	177	81	80	-1	25.8546	25.5354	-0.319193
成功	25	2	10	5	50	1	1	1	0	2	8	10	8	12	53.64	53.64	53.9	53.9	60.22	51.75	50.71	50.71	54.48	54.48	54.74	29.86	54.3	32.2	57.45	28.83	52.7345	61.5292	54.4771	35.1924	165.9	49.3	53	3.7	17.9124	19.2568	1.34434
成功	32	2	40	10	400	1	0	0	0	0	0	1	0	1	53.64	53.64	53.9	53.9	60.22	60.22	50.71	50.71	45.27	45.27	45.23	45.23	49.07	44.48	38.46	38.46	58.7219	59.4013	37.1627	35.1924	158.6	47.7	45.5	-2.2	18.9632	18.0886	-0.874614
成功	47	1	15	27	405	1	0	0	2	2	2	1	4	3	53.64	53.64	53.9	53.9	60.22	60.22	58.7	50.71	54.48	54.48	54.74	54.74	54.3	54.3	57.45	57.45	54.5741	52.7345	54.3157	54.4771	168.8	65.4	65	-0.4	22.9527	22.8123	-0.140383
成功	30	1	20	10	200	0	0	0	1	0	2	1	3	1	53.64	53.64	53.9	48.47	60.22	60.22	50.71	58.7	54.48	54.48	54.74	54.74	54.3	54.3	57.45	57.45	52.7345	52.4935	54.4771	55.2159	179.8	55.5	58	2.5	17.1678	17.9411	0.773322
成功	29	2	30	10	300	0	1	0	9	0	5	0	14	0	41.93	53.64	42.58	53.9	37.91	51.75	41.11	58.7	45.27	59.64	38.44	54.74	32.2	54.3	38.46	57.45	42.5671	52.1429	36.0469	56.5338	159.8	41.8	46	4.2	16.369	18.0138	1.64473
成功	48	1	10	28	280	1	0	0	6	1	1	4	7	5	53.64	53.64	48.47	53.9	60.22	60.22	41.11	58.7	45.27	54.48	45.23	54.74	49.07	54.3	50.28	57.45	50.8295	54.5741	45.0632	54.3157	170.2	69.8	70	0.2	24.0955	24.1646	0.0690416
成功	44	1	10	25	250	0	0	0	2	1	1	1	3	2	53.64	53.64	53.9	53.9	60.22	46.19	50.71	58.7	59.64	54.48	54.74	54.74	54.3	54.3	57.45	57.45	53.1234	49.9028	55.3407	56.5594	171.6	58.7	59	0.3	19.9344	20.0363	0.101879
成功	27	1	20	7	140	1	0	0	0	0	0	0	0	0	53.64	53.64	53.9	53.9	51.75	60.22	50.71	58.7	54.48	59.64	45.23	54.74	44.48	54.3	38.46	57.45	57.2754	54.963	38.0884	55.1793	171.5	66.2	70	3.8	22.5076	23.7996	1.29198
成功	40	1	20	0.5	10	1	1	1	16	14	8	7	24	21	48.52	53.64	48.47	48.47	60.22	51.75	41.11	41.11	39.78	45.27	29.86	38.44	44.48	49.07	50.28	44.99	49.2087	49.7078	39.0061	41.5203	159.1	64.8	65	0.2	25.5997	25.6787	0.0790114
成功	24	1	30	7	210	1	1	1	9	4	2	5	11	9	53.64	53.64	42.58	53.9	46.19	60.22	41.11	50.71	45.27	59.64	54.74	54.74	54.3	49.07	57.45	50.28	40.8213	56.0822	57.2499	48.9669	178.3	66.5	68	1.5	20.9179	21.3898	0.471833
成功	41	1	10	21	210	1	0	0	2	1	4	2	6	3	53.64	53.64	53.9	53.9	60.22	60.22	58.7	58.7	54.48	59.64	45.23	54.74	44.48	49.07	38.46	50.28	61.9351	57.9219	36.5724	48.8055	167.9	60.2	63	2.8	21.3548	22.348	0.993246
成功	46	1	30	25	750	1	0	0	0	0	0	0	0	0	48.52	53.64	53.9	53.9	60.22	60.22	50.71	50.71	54.48	54.48	54.74	54.74	49.07	54.3	44.99	44.99	55.2227	56.5309	46.0797	47.3022	176.5	84.3	88	3.7	27.0606	28.2484	1.18772
成功	39	1	20	20	400	1	0	0	0	0	2	2	2	2	53.64	41.93	48.47	48.47	46.19	60.22	50.71	58.7	54.48	59.64	45.23	29.86	49.07	32.2	44.99	38.46	50.6745	57.4945	45.6083	31.2131	163.6	60.9	65	4.1	22.7536	24.2855	1.53185
成功	44	1	30	24	720	1	0	0	4	2	0	0	4	2	48.52	53.64	48.47	53.9	51.75	51.75	41.11	58.7	39.78	45.27	54.74	45.23	32.2	49.07	38.46	50.28	51.4907	54.14	35.0661	45.1621	172.6	64.4	65.6	1.2	21.6174	22.0203	0.402809
成功	50	2	20	22	440	0	1	1	6	7	3	8	9	15	48.52	36.68	42.58	32.76	28.13	37.91	30.36	41.11	39.78	45.27	20.5	38.44	32.2	49.07	28.83	28.83	42.2652	35.824	25.1566	37.5731	159.6	56.6	58	1.4	22.2203	22.77	0.54962
成功	39	1	40	25	1000	0	1	1	16	8	9	3	25	11	48.52	53.64	48.47	53.9	51.75	60.22	41.11	50.71	45.27	54.48	38.44	29.86	49.07	44.48	50.28	38.46	46.0136	60.2914	45.589	32.5434	172.2	78	81	3	26.3044	27.3161	1.01171
成功	63	2	20	40	800	0	0	0	3	0	2	0	5	0	53.64	53.64	42.58	53.9	51.75	46.19	50.71	50.71	54.48	54.48	54.74	54.74	49.07	54.3	50.28	50.28	48.5358	50.2478	51.3346	52.5921	162	53	56	3	20.1951	21.3382	1.14312
成功	44	1	20	25	500	1	0	0	2	0	1	0	3	0	48.52	48.52	53.9	53.9	60.22	60.22	50.71	50.71	54.48	54.48	54.74	54.74	54.3	54.3	57.45	57.45	50.6521	50.6521	55.4996	55.4996	172.5	79.2	83	3.8	26.6163	27.8933	1.27704
成功	30	2	30	17	510	0	0	1	0	9	2	5	2	14	36.68	48.52	32.76	48.47	60.22	51.75	50.71	50.71	54.48	45.27	38.44	45.23	44.48	49.07	50.28	38.46	41.5824	51.7388	48.581	40.44	148.6	43	45	2	19.4729	20.3786	0.905717
成功	54	1	30	34	1020	0	1	0	9	0	6	0	15	0	41.93	53.64	32.76	53.9	46.19	46.19	41.11	50.71	39.78	54.48	29.86	54.74	32.2	49.07	38.46	50.28	41.2568	51.022	33.0927	50.347	171.7	74.3	82	7.7	25.2028	27.8146	2.61186
成功	76	1	10	50	500	1	0	0	0	0	0	0	0	0	41.93	48.52	48.47	48.47	51.75	51.75	50.71	58.7	54.48	54.48	54.74	54.74	54.3	54.3	57.45	57.45	43.0711	47.591	59.0706	57.593	165.1	64	67	3	23.4793	24.5799	1.10059
成功	40	2	10	20	200	0	0	0	0	0	1	0	1	0	53.64	53.64	53.9	53.9	51.75	60.22	50.71	50.71	54.48	54.48	54.74	54.74	54.3	54.3	44.99	57.45	53.7109	52.7345	48.6568	54.4771	160	57	60	3	22.2656	23.4375	1.17187
成功	33	2	10	14	140	1	0	0	1	0	5	3	6	3	53.64	53.64	53.9	53.9	60.22	60.22	50.71	50.71	59.64	45.27	54.74	54.74	54.3	54.3	57.45	44.99	53.1234	55.8368	55.3407	45.7608	155	44.3	48	3.7	18.4391	19.9792	1.54006
成功	51	1	30	20	600	0	1	0	6	4	5	3	11	7	53.64	53.64	53.9	53.9	51.75	60.22	50.71	50.71	59.64	54.48	45.23	38.44	54.3	32.2	50.28	38.46	52.6092	61.9999	49.9737	38.7602	171.4	77.6	79	1.4	26.4144	26.8909	0.476548
成功	41	2	15	21	315	0	0	0	0	0	0	0	0	0	41.93	41.93	42.58	42.58	60.22	46.19	50.71	58.7	54.48	45.27	38.44	38.44	49.07	44.48	50.28	44.99	46.801	45.5664	47.8747	43.399	160.6	53	57	4	20.5487	22.0996	1.55085
成功	54	2	20	30	600	1	0	0	3	4	2	1	5	5	53.64	53.64	53.9	53.9	46.19	37.91	50.71	50.71	54.48	45.27	45.23	45.23	49.07	44.48	50.28	38.46	51.1433	51.9732	47.7542	38.7602	151.6	48.8	52	3.2	21.2335	22.6259	1.39236
成功	48	1	1	20	20	1	0	0	2	2	4	4	6	6	53.64	48.52	53.9	48.47	51.75	51.75	58.7	58.7	54.48	54.48	54.74	54.74	49.07	54.3	50.28	57.45	54.7129	47.591	49.2964	57.593	170.7	75.7	75	-0.7	25.9794	25.7392	-0.240232
成功	33	2	20	10	200	0	0	0	0	0	1	0	1	0	53.64	53.64	53.9	53.9	60.22	60.22	50.71	58.7	54.48	54.48	54.74	54.74	54.3	54.3	57.45	57.45	52.7345	54.5741	54.4771	54.3157	166.2	52.9	57	4.1	19.1511	20.6354	1.4843
成功	27	2	20	9	180	1	1	1	20	16	12	12	32	28	36.68	36.68	32.76	32.76	46.19	28.13	30.36	30.36	28.26	28.26	29.86	20.5	32.2	13.53	28.83	28.83	38.7124	35.5823	26.885	19.2068	152.5	49.3	48	-1.3	21.1986	20.6396	-0.55899
成功	45	2	20	20	400	1	0	0	1	1	2	3	3	4	53.64	53.64	53.9	53.9	60.22	51.75	50.71	50.71	54.48	54.48	54.74	54.74	54.3	49.07	57.45	50.28	52.7345	52.8732	54.4771	49.4578	158.9	64.2	63	-1.2	25.4265	24.9513	-0.475262
成功	37	1	15	13	195	0	0	0	2	2	1	1	3	3	53.64	53.64	53.9	53.9	60.22	51.75	50.71	50.71	54.48	45.27	54.74	45.23	54.3	54.3	57.45	50.28	52.7345	51.5261	54.4771	47.5686	165.6	63.9	65	1.1	23.3013	23.7024	0.401118
成功	46	1	20	26	520	1	1	0	7	3	8	3	15	6	53.64	53.64	53.9	53.9	46.19	46.19	50.71	50.71	45.27	45.27	45.23	38.44	49.07	44.48	50.28	44.99	50.4491	52.827	46.2127	39.345	179.3	59.8	63	3.2	18.6012	19.5966	0.995381
成功	39	2	10	20	200	1	0	0	3	3	3	4	6	7	53.64	53.64	53.9	53.9	60.22	60.22	50.71	50.71	54.48	54.48	54.74	54.74	49.07	49.07	50.28	50.28	55.6933	55.6933	48.1033	48.1033	166.1	56.3	58.9	2.6	20.4065	21.3489	0.942397
成功	38	2	20	20	400	1	1	0	11	0	2	0	13	0	41.93	48.52	42.58	48.47	46.19	60.22	41.11	41.11	45.27	45.27	38.44	45.23	44.48	44.48	44.99	44.99	41.5165	51.0384	43.7544	41.0692	153.9	46.5	45	-1.5	19.6325	18.9992	-0.633307
成功	35	2	40	15	600	1	1	1	10	8	9	6	19	14	41.93	41.93	42.58	42.58	46.19	37.91	41.11	41.11	45.27	45.27	29.86	29.86	44.48	32.2	44.99	38.46	41.6259	42.6765	41.4151	33.7076	157.5	51.8	54.8	3	20.8818	22.0912	1.20937
成功	30	1	20	10	200	1	1	0	5	0	3	2	8	2	41.93	53.64	42.58	53.9	46.19	60.22	50.71	58.7	54.48	54.48	45.23	54.74	49.07	49.07	50.28	57.45	42.0431	55.3483	51.9696	52.0706	167.1	65.1	63	-2.1	23.3146	22.5625	-0.752084
成功	51	1	20	30	600	1	0	0	6	0	1	0	7	0	53.64	53.64	53.9	53.9	60.22	60.22	50.71	50.71	54.48	54.48	54.74	54.74	49.07	32.2	44.99	38.46	57.3051	61.792	45.0572	34.0552	177	83	81	-2	26.493	25.8546	-0.638386
成功	59	1	20	40	800	1	0	0	0	1	2	2	2	3	41.93	53.64	48.47	53.9	30.7	51.75	50.71	58.7	45.27	54.48	54.74	54.74	54.3	54.3	57.45	57.45	35.3684	51.754	60.8954	55.6702	172.7	62.2	69	6.8	20.8548	23.1347	2.27994
成功	44	2	24	25	600	0	0	0	0	0	2	2	2	2	41.93	53.64	42.58	53.9	30.7	60.22	30.36	58.7	39.78	54.48	38.44	54.74	32.2	54.3	28.83	50.28	40.2118	56.7588	30.953	50.187	154.6	40.6	45	4.4	16.9866	18.8275	1.84091
成功	43	1	10	25	250	1	0	0	0	0	0	0	0	0	53.64	53.64	53.9	53.9	60.22	46.19	50.71	58.7	54.48	54.48	54.74	54.74	54.3	54.3	57.45	57.45	52.7345	49.9028	54.4771	56.5594	169.1	51.8	52	0.2	18.1152	18.1851	0.0699428
成功	59	2	15	35	525	0	0	0	0	2	2	2	2	4	48.52	53.64	48.47	53.9	51.75	60.22	50.71	50.71	45.27	54.48	54.74	54.74	44.48	49.07	44.99	50.28	50.3073	55.6933	44.8227	48.1033	161.5	48.9	49	0.1	18.7484	18.7867	0.0383403
成功	56	1	16	36	576	1	0	0	0	1	0	0	0	1	53.64	53.64	53.9	53.9	60.22	60.22	33.37	41.11	39.78	45.27	54.74	54.74	54.3	54.3	57.45	38.46	47.6342	55.2023	52.367	41.2756	168	86.9	92	5.1	30.7894	32.5964	1.80697
成功	66	1	40	40	1600	1	0	0	1	1	0	1	1	2	13.5	53.64	15.7	48.47	30.7	37.91	41.11	41.11	39.78	45.27	20.5	38.44	49.07	44.48	50.28	57.45	12.0201	41.9828	55.5725	48.9381	170	67	71	4	23.1834	24.5675	1.38408
成功	28	2	20	12	240	0	0	0	1	0	1	2	2	2	53.64	53.64	53.9	53.9	60.22	60.22	50.71	58.7	59.64	59.64	54.74	54.74	54.3	54.3	57.45	57.45	53.1234	54.963	55.3407	55.1793	158	47	50	3	18.8271	20.0288	1.20173
成功	56	2	20	30	600	0	0	0	0	0	1	1	1	1	53.64	53.64	53.9	53.9	60.22	51.75	50.71	50.71	54.48	45.27	54.74	54.74	54.3	49.07	44.99	50.28	56.5309	52.1791	47.3022	47.9163	168	89.5	75.5	-14	31.7106	26.7503	-4.96032
成功	28	1	15	12	180	1	1	0	2	1	12	1	14	2	53.64	53.64	48.47	53.9	60.22	46.19	50.71	50.71	54.48	54.48	45.23	54.74	49.07	54.3	50.28	57.45	53.734	48.0632	46.4107	56.7208	168	57.9	59.5	1.6	20.5145	21.0813	0.566893
成功	74	2	10	50	500	0	0	0	0	0	0	0	0	0	48.52	48.52	53.9	48.47	60.22	60.22	50.71	50.71	45.27	54.48	54.74	54.74	54.3	54.3	57.45	57.45	49.9579	48.5715	53.9582	56.3999	154	52.3	53	0.7	22.0526	22.3478	0.295159
成功	40	2	15	20	300	1	0	0	0	1	3	5	3	6	48.52	53.64	53.9	53.9	60.22	60.22	50.71	50.71	54.48	54.48	45.23	45.23	54.3	54.3	38.46	38.46	56.5594	58.6418	41.9718	40.9493	167	61.4	60.5	-0.9	22.0158	21.6931	-0.322708
成功	61	2	20	20	400	1	1	1	10	7	13	6	23	13	48.52	41.93	42.58	42.58	51.75	46.19	33.37	41.11	45.27	45.27	45.23	38.44	44.48	49.07	38.46	44.99	46.169	40.837	39.7965	45.7247	149	52.2	55	2.8	23.5125	24.7737	1.2612
成功	35	1	20	10	200	1	0	0	4	4	2	1	6	5	53.64	48.52	42.58	48.47	37.91	46.19	41.11	41.11	45.27	45.27	54.74	45.23	54.3	49.07	50.28	50.28	40.2491	44.0758	54.4454	48.3294	175	108.3	103	-5.3	35.3633	33.6327	-1.73061
成功	52	2	15	30	450	0	1	1	7	6	8	7	15	13	41.93	36.68	42.58	32.76	37.91	30.7	41.11	33.37	39.78	39.78	38.44	29.86	32.2	49.07	28.83	44.99	45.0875	27.6952	29.5828	47.7767	156	58.3	63	4.7	23.9563	25.8876	1.9313
成功	61	1	30	40	1200	1	0	0	0	4	0	2	0	6	41.93	36.68	53.9	53.9	51.75	37.91	41.11	41.11	54.48	54.48	54.74	54.74	54.3	54.3	57.45	57.45	42.9414	36.1981	58.3642	61.6261	172	67	69	2	22.6474	23.3234	0.676041
成功	68	2	40	48	1920	0	0	0	3	2	0	0	3	2	41.93	41.93	48.47	42.58	60.22	46.19	50.71	50.71	54.48	45.27	54.74	54.74	49.07	54.3	57.45	57.45	46.6654	38.2689	55.471	59.3947	160	59.4	62	2.6	23.2031	24.2188	1.01562
成功	44	2	20	22	440	1	1	1	9	5	6	9	15	14	48.52	53.64	48.47	53.9	37.91	46.19	50.71	50.71	54.48	45.27	54.74	54.74	49.07	54.3	44.99	50.28	45.714	49.5537	50.5478	51.0506	155	49.8	50.4	0.6	20.7284	20.9781	0.24974
成功	71	1	20	50	1000	1	1	0	4	0	9	0	13	0	48.52	41.93	48.47	42.58	51.75	37.91	50.71	41.11	54.48	45.27	38.44	29.86	49.07	44.48	50.28	44.99	48.918	38.8691	46.9366	42.7392	162	56.5	52	-4.5	21.5287	19.8141	-1.71468
成功	56	2	10	40	400	0	0	0	3	3	3	4	6	7	53.64	53.64	53.9	53.9	46.19	30.7	50.71	50.71	45.27	45.27	54.74	54.74	54.3	54.3	28.83	28.83	56.0893	50.9319	38.699	41.1762	165	46	46.3	0.3	16.8962	17.0064	0.110193
成功	50	1	20	20	400	1	1	0	5	2	4	2	9	4	53.64	41.93	53.9	42.58	60.22	46.19	50.71	50.71	45.27	45.27	54.74	38.44	49.07	44.48	44.99	44.99	56.611	43.7268	43.5157	43.5604	167	79.3	79.5	0.2	28.4341	28.5059	0.0717129
成功	64	1	30	18	540	0	0	0	0	0	0	1	0	1	48.52	53.64	48.47	53.9	46.19	37.91	41.11	41.11	45.27	39.78	54.74	54.74	54.3	54.3	44.99	50.28	44.7922	44.1728	50.1212	51.6498	172	68	72.3	4.3	22.9854	24.4389	1.45349
成功	45	2	20	27	540	0	1	0	4	3	4	3	8	6	41.93	53.64	42.58	48.47	46.19	30.7	50.71	58.7	54.48	54.48	45.23	54.74	54.3	54.3	57.45	57.45	39.0843	42.6648	58.3434	59.9368	171	94.1	97	2.9	32.1808	33.1726	0.991758
成功	64	1	20	46	920	1	1	1	8	8	4	8	12	16	41.93	41.93	42.58	48.47	46.19	60.22	41.11	58.7	54.48	54.48	54.74	45.23	49.07	54.3	50.28	57.45	39.7116	47.8521	54.7564	54.9618	161.8	76.2	80.8	4.6	29.107	30.8642	1.75712
成功	61	1	15	1	15	0	0	0	0	1	2	2	2	3	41.93	41.93	53.9	53.9	30.7	46.19	50.71	58.7	54.48	54.48	38.44	38.44	44.48	44.48	38.46	44.99	45.5907	50.5981	41.9422	43.0638	169	69.2	70.6	1.4	24.2288	24.719	0.490179
成功	72	1	20	55	1100	0	0	0	1	1	0	0	1	1	53.64	53.64	53.9	53.9	60.22	60.22	58.7	58.7	59.64	59.64	54.74	54.74	54.3	54.3	57.45	57.45	54.963	54.963	55.1793	55.1793	170	68.8	77	8.2	23.8062	26.6436	2.83737
成功	34	1	10	14	140	1	0	0	2	2	3	3	5	5	53.64	53.64	53.9	53.9	46.19	46.19	41.11	50.71	45.27	45.27	38.44	54.74	44.48	49.07	38.46	50.28	52.6063	50.3279	35.7787	48.8055	167	56	59	3	20.0796	21.1553	1.07569
成功	74	2	15	50	750	0	0	0	4	3	3	2	7	5	41.93	36.68	32.76	32.76	37.91	37.91	41.11	58.7	54.48	45.27	20.5	38.44	49.07	44.48	57.45	50.28	31.4439	35.2998	52.5021	50.4459	151	55.6	55	-0.6	24.3849	24.1217	-0.263146
成功	62	1	20	45	900	0	0	0	3	5	0	2	3	7	36.68	48.52	32.76	48.47	46.19	46.19	41.11	50.71	39.78	45.27	38.44	45.23	44.48	54.3	50.28	50.28	33.5929	45.5119	48.5582	50.3806	171.1	102	95.3	-6.7	34.8418	32.5531	-2.28863
成功	65	2	20	40	800	0	0	0	0	0	1	0	1	0	53.64	53.64	53.9	53.9	51.75	46.19	58.7	50.71	54.48	54.48	54.74	54.74	54.3	54.3	50.28	50.28	53.9387	50.2478	51.5415	52.5921	158	54.2	54	-0.2	21.7113	21.6311	-0.0801154
成功	50	2	40	20	800	1	1	1	14	11	8	13	22	24	53.64	36.68	53.9	32.76	46.19	37.91	33.37	41.11	28.26	39.78	38.44	38.44	54.3	32.2	38.46	44.99	48.0885	36.2553	37.3035	37.8046	161.7	57.3	62	4.7	21.9147	23.7122	1.79754
成功	72	1	25	50	1250	1	0	0	1	4	1	2	2	6	48.52	48.52	53.9	53.9	60.22	51.75	50.71	50.71	59.64	54.48	54.74	54.74	54.3	49.07	50.28	50.28	53.2256	50.7908	52.2346	50.4804	170	68.8	69.1	0.3	23.8062	23.91	0.103806
成功	56	1	20	30	600	1	0	0	2	2	4	5	6	7	48.52	48.52	48.47	53.9	51.75	51.75	50.71	50.71	45.27	45.27	45.23	54.74	49.07	49.07	50.28	50.28	48.1373	50.0967	47.2463	48.9389	177	76.7	76.7	0	24.4821	24.4821	0
成功	45	2	40	30	1200	0	0	0	3	1	0	2	3	3	53.64	53.64	42.58	53.9	30.7	37.91	33.37	58.7	45.27	54.48	54.74	54.74	44.48	49.07	38.46	44.99	41.1215	51.7166	44.733	48.4636	158	61	56	-5	24.4352	22.4323	-2.00288
成功	68	2	7	10	70	0	1	1	7	3	5	5	12	8	48.52	53.64	48.47	53.9	60.22	60.22	50.71	58.7	54.48	54.48	54.74	54.74	49.07	54.3	50.28	50.28	51.5303	56.7588	50.0261	50.187	150	55.9	54.3	-1.6	24.8444	24.1333	-0.711111
成功	41	2	8	20	160	0	0	1	3	12	3	12	6	24	41.93	36.68	32.76	32.76	30.7	30.7	41.11	33.37	45.27	39.78	29.86	38.44	32.2	32.2	38.46	50.28	36.5132	28.4713	36.4887	45.9203	160	54.7	53.5	-1.2	21.3672	20.8984	-0.46875
成功	44	2	20	25	500	0	1	0	3	4	5	1	8	5	53.64	36.68	42.58	53.9	46.19	60.22	50.71	50.71	54.48	54.48	54.74	38.44	44.48	44.48	44.99	44.99	48.9758	51.2945	47.2072	42.03	151	43.7	48	4.3	19.1658	21.0517	1.88588
成功	49	2	10	29	290	0	1	1	14	3	11	8	25	11	41.93	36.68	42.58	32.76	37.91	37.91	41.11	33.37	45.27	45.27	29.86	38.44	32.2	32.2	38.46	38.46	42.6765	34.887	33.7076	38.8798	154.6	48.8	53.3	4.5	20.4174	22.3002	1.88275
成功	57	1	50	35	1750	1	1	1	9	8	8	8	17	16	53.64	53.64	53.9	48.47	46.19	46.19	50.71	50.71	54.48	54.48	54.74	54.74	54.3	49.07	50.28	50.28	50.2478	48.9414	52.5921	51.2472	171	74.3	85	10.7	25.4095	29.0688	3.65925
成功	61	2	20	40	800	1	0	0	1	0	5	7	6	7	36.68	36.68	32.76	15.7	30.7	30.7	41.11	33.37	39.78	45.27	29.86	29.86	32.2	32.2	38.46	38.46	33.9641	26.059	36.6184	40.522	168	71.3	83.2	11.9	25.2622	29.4785	4.21627
成功	65	2	20	38	760	0	0	0	0	2	0	2	0	4	53.64	53.64	53.9	53.9	46.19	60.22	50.71	58.7	45.27	54.48	45.23	54.74	49.07	54.3	50.28	57.45	50.4491	54.5741	46.2127	54.3157	156	54	58	4	22.1893	23.833	1.64366
成功	56	1	50	36	1800	0	0	1	4	6	3	4	7	10	53.64	48.52	42.58	48.47	37.91	30.7	50.71	50.71	45.27	45.27	54.74	38.44	44.48	54.3	44.99	57.45	45.5248	38.2565	46.9899	55.1352	170	61.6	68	6.4	21.3149	23.5294	2.21453
成功	58	1	30	40	1200	0	1	1	10	7	8	8	18	15	48.52	41.93	48.47	42.58	46.19	46.19	33.37	41.11	45.27	45.27	38.44	45.23	44.48	44.48	44.99	50.28	44.6716	39.8181	41.618	48.6517	166.3	67.8	63	-4.8	24.5158	22.7801	-1.73563
成功	71	2	10	30	300	0	0	0	5	2	1	0	6	2	48.52	53.64	53.9	53.9	51.75	60.22	50.71	50.71	54.48	45.27	54.74	54.74	54.3	54.3	57.45	50.28	47.832	54.225	56.8542	48.8069	152	46.2	45.4	-0.8	19.9965	19.6503	-0.34626
成功	76	1	10	55	550	0	0	0	2	6	2	0	4	6	36.68	36.68	42.58	32.76	46.19	30.7	33.37	33.37	45.27	45.27	54.74	29.86	44.48	32.2	44.99	50.28	37.3913	32.5959	49.4033	48.4636	146	42.6	46.7	4.1	19.985	21.9084	1.92344
成功	67	1	20	47	940	1	0	0	1	3	0	2	1	5	48.52	48.52	48.47	48.47	46.19	46.19	50.71	50.71	45.27	45.27	54.74	45.23	54.3	49.07	57.45	50.28	43.206	46.2861	57.1021	48.1355	163	61.8	63.6	1.8	23.2602	23.9377	0.677481
成功	79	1	10	59	590	0	0	0	2	0	0	0	2	0	53.64	53.64	53.9	53.9	60.22	60.22	50.71	50.71	54.48	54.48	54.74	45.23	54.3	54.3	57.45	50.28	52.7345	55.0404	54.4771	47.7556	160	56	58	2	21.875	22.6562	0.78125
成功	33	2	10	15	150	0	1	0	2	3	7	4	9	7	53.64	53.64	53.9	48.47	60.22	51.75	50.71	50.71	54.48	54.48	54.74	54.74	54.3	49.07	57.45	50.28	52.7345	50.7926	54.4771	50.3581	159	54.4	56.6	2.2	21.5181	22.3884	0.870219
成功	45	1	20	25	500	1	1	1	11	8	5	6	16	14	53.64	41.93	53.9	42.58	51.75	46.19	50.71	50.71	54.48	45.27	54.74	54.74	54.3	49.07	57.45	50.28	49.9144	41.2277	55.8316	53.021	170	65.7	67	1.3	22.7336	23.1834	0.449827
成功	67	1	20	40	800	1	0	0	0	0	1	0	1	0	36.68	36.68	32.76	48.47	46.19	60.22	33.37	50.71	45.27	45.27	38.44	38.44	49.07	32.2	44.99	38.46	33.157	52.3271	48.5576	32.3572	168	53.9	55	1.1	19.0972	19.487	0.389739
成功	57	1	10	37	370	1	0	0	1	4	2	3	3	7	48.52	48.52	48.47	42.58	60.22	46.19	50.71	50.71	45.27	45.27	54.74	54.74	49.07	49.07	44.99	50.28	52.448	43.908	45.4385	51.7048	167	76.6	70	-6.6	27.466	25.0995	-2.36652
成功	69	1	20	54	1080	1	1	1	5	7	4	6	9	13	13.5	48.52	42.58	48.47	51.75	46.19	30.36	33.37	28.26	39.78	54.74	29.86	32.2	32.2	28.83	44.99	34.5813	46.185	35.7806	37.8046	159	48.8	49	0.2	19.303	19.3821	0.0791108
成功	67	1	13	47	611	1	0	0	4	1	0	1	4	2	53.64	48.52	53.9	53.9	60.22	60.22	61.52	58.7	59.64	54.48	54.74	54.74	54.3	54.3	57.45	57.45	55.6123	52.4917	55.1223	55.3382	176	71.5	72.5	1	23.0824	23.4052	0.322831
